# Supplementary material
Source: PubMed Central journal article supplement (PMC3258622)
Supplement: 1118434109_pnas.201118434SI.pdf [file 1118434109_pnas.201118434SI.pdf]

# Supporting Information

Yarov-Yarovoy et al. 10.1073/pnas.1118434109

Supporting Information Corrected January 23, 2012

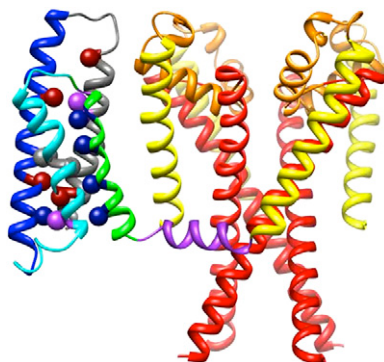

**Movie S1.** View of the conformational changes between the Resting State 1 and Activated State 3 of NaChBac from the side of the membrane. Only a single voltage-sensing domain is shown attached to the tetramer of pore domain for clarity. The models represented are as in Fig. 5B. [Movies S1](#), [S2](#), and [S3](#) were generated using the University of California at San Francisco Chimera package (1).

## [Movie S1](#)

1. Pettersen EF, et al. (2004) USCF Chimera—a visualization system for exploratory research and analysis. *J Comput Chem* 25:1605–1612.

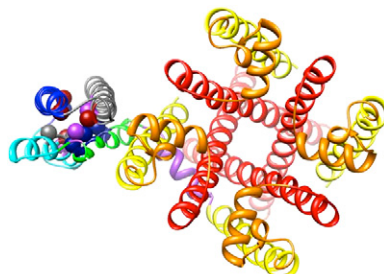

**Movie S2.** View of the conformational changes between the Resting State 1 and Activated State 3 of NaChBac shown in [Movie S1](#) from the extracellular side of the membrane.

## [Movie S2](#)

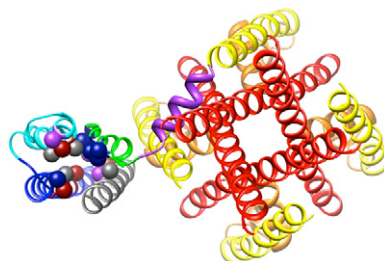

**Movie S3.** View of the conformational changes between the Resting State 1 and Activated State 3 of NaChBac shown in [Movie S1](#) from the intracellular side of the membrane.

## [Movie S3](#)

## Other Supporting Information File

[SI Appendix \(PDF\)](#)
